# Supplementary material for: Lawns and meadows in urban green space – a comparison from perspectives of greenhouse gases, drought resilience and plant functional types
Source: Copernicus journal article supplement (doi:10.5194/bg-21-949-2024), 2024-02-21
Supplement: Supplementary file 1 [file bg-21-949-2024-supplement.pdf]

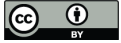

*Supplement of*

## **Lawns and meadows in urban green space – a comparison from perspectives of greenhouse gases, drought resilience and plant functional types**

**Justine Trémeau et al.**

*Correspondence to:* Justine Trémeau ([justine.tremeau@hotmail.com](mailto:justine.tremeau@hotmail.com)) and Liisa Kulmala ([liisa.kulmala@fmi.fi](mailto:liisa.kulmala@fmi.fi))

The copyright of individual parts of the supplement might differ from the article licence.

**Table S1.** Main soil characteristics of each intensive site and satellite plot (NA = non-available). The particle distribution was originally determined for Finnish classification and therefore, approximations were made for sand (0.06–2.0 mm), silt (0.002–0.06 mm) and clay (< 0.002 mm). Year = year of sample collections. CEC = Cation exchange capacity.

| Experiment | Location | Management | Year | Soil texture | Physical characteristics              |             |             |             | Chemical characteristics |                                 |                            |                            |
|------------|----------|------------|------|--------------|---------------------------------------|-------------|-------------|-------------|--------------------------|---------------------------------|----------------------------|----------------------------|
|            |          |            |      |              | Soil density<br>(kg m <sup>-3</sup> ) | sand<br>(%) | silt<br>(%) | clay<br>(%) | pH                       | CEC<br>(cmol kg <sup>-1</sup> ) | K<br>(mg L <sup>-1</sup> ) | P<br>(mg L <sup>-1</sup> ) |
| Intensive  | KMP      | lawn       | 2021 | Sandy loam   | 873                                   | 72.2        | 25.6        | 2.2         | 6.3                      | NA                              | 220                        | 18.0                       |
|            |          | meadow     | 2021 | Sandy loam   | 3166                                  | 72.4        | 17.1        | 10.5        | 6.1                      | NA                              | 120                        | 3.8                        |
|            | VKI      | lawn       | 2020 | Sandy loam   | 865                                   | 69.5        | 22.1        | 8.4         | 5.6                      | NA                              | 97                         | 12.0                       |
|            |          | meadow     | 2021 | Sandy loam   | 2265                                  | 59.1        | 31.8        | 9.1         | 6.5                      | NA                              | 230                        | 380.0                      |
| Satellite  | JMT-3    | lawn       | 2022 | Silt loam    | NA                                    | 5.2         | 68.9        | 26.0        | 5.3 (± 0.1)              | 20.3 (± 1.3)                    | 220 (± 50)                 | 4.6 (± 0.6)                |
|            |          | meadow     | 2022 | Loamy sand   | NA                                    | 73.7        | 23.5        | 2.8         | 6.5 (± 0.2)              | 15.8 (± 0.5)                    | 84 (± 11)                  | 1.9 (± 0.4)                |
|            | JMT-7    | lawn       | 2022 | Loamy sand   | NA                                    | 82.7        | 14.9        | 2.4         | 6.5 (± 0.1)              | 16.5 (± 1.3)                    | 150 (± 22)                 | 26.5 (± 1.7)               |
|            |          | meadow     | 2022 | Loamy sand   | NA                                    | 81.4        | 16.0        | 2.6         | 6.5 (± 0.2)              | 14.8 (± 1.7)                    | 155 (± 21)                 | 23.3 (± 2.1)               |
|            | KO-4     | lawn       | 2022 | Sandy loam   | NA                                    | 66.2        | 29.4        | 4.4         | 6.4 (± 0.3)              | 15.3 (± 1.5)                    | 73 (± 4)                   | 2.2 (± 0.3)                |
|            |          | meadow     | 2022 | Sandy loam   | NA                                    | 63.3        | 32.7        | 4.0         | 6.1 (± 0.4)              | 13.8 (± 1.3)                    | 125 (± 17)                 | 5.2 (± 3.4)                |
|            | PK-3     | lawn       | 2022 | Sandy loam   | NA                                    | 68.8        | 27.6        | 3.6         | 6.2 (± 0.1)              | 14.5 (± 1.3)                    | 92 (± 4)                   | 2.2 (± 0.5)                |
|            |          | meadow     | 2022 | Sandy loam   | NA                                    | 68.4        | 27.1        | 4.5         | 6.1 (± 0.1)              | 15.0 (± 2.2)                    | 99 (± 14)                  | 2.8 (± 0.4)                |
|            | SK-1     | lawn       | 2022 | Sandy loam   | NA                                    | 57.3        | 33.9        | 8.8         | 5.6 (± 0.1)              | 15.5 (± 1.3)                    | 125 (± 17)                 | 3.3 (± 0.7)                |
|            |          | meadow     | 2022 | Sandy loam   | NA                                    | 54.1        | 36.5        | 9.4         | 5.4 (± 0.0)              | 13.3 (± 1.3)                    | 163 (± 28)                 | 4.0 (± 0.5)                |
|            | SMT-12   | lawn       | 2022 | Loam         | NA                                    | 47.7        | 42.7        | 9.7         | 5.8 (± 0.1)              | 11.3 (± 1.3)                    | 155 (± 19)                 | 5.6 (± 1.9)                |
|            |          | meadow     | 2022 | Loam         | NA                                    | 51.8        | 39.6        | 8.6         | 6.1 (± 0.2)              | 16.5 (± 0.6)                    | 160 (± 29)                 | 5.3 (± 1.5)                |

**Table S2.** Measurement campaign timeline.

Total number of TER measurements (total number of GPP measurements, number of quality-controlled GPP measurements) measured with the LI-COR device at the intensive sites. All TER measurements passed the quality control.

Total number of TER, CH<sub>4</sub> and N<sub>2</sub>O measurements (-number of TER measurements removed in the quality control, if any) measured with the Gasmeter device at the satellite sites. All CH<sub>4</sub> and N<sub>2</sub>O measurements passed the quality control.

Total number of TER measurements measured with the Vaisala device at the satellite sites. All measurements passed the quality control.

| Year                      | Week               | Intensive sites    |                    |                    |                | Satellite sites |                |                |           |                |                |                |                |                |                |                |           |
|---------------------------|--------------------|--------------------|--------------------|--------------------|----------------|-----------------|----------------|----------------|-----------|----------------|----------------|----------------|----------------|----------------|----------------|----------------|-----------|
|                           |                    | KMP                |                    | VKI                |                | JMT3            |                | JMT7           |           | KO4            |                | PK3            |                | SK1            |                | SMT12          |           |
|                           |                    | lawn               | meadow             | lawn               | meadow         | lawn            | meadow         | lawn           | meadow    | lawn           | meadow         | lawn           | meadow         | lawn           | meadow         | lawn           | meadow    |
| 2020                      | 29                 |                    |                    |                    |                | 4               | 4              | 4              | 4         | 4              | 4              | 4              | 4              | 4              | 4              | 4              | 4         |
|                           | 34                 |                    |                    |                    |                | 4               | 4              | 4              | 4         | 4              | 4              | 4 (-2)         | 4              | 4 (-1)         | 4              | 4              | 4         |
|                           | 41                 |                    |                    |                    |                | 4               | 4              | 4              | 4         | 4              | 4              | 4              | 4              | 4              | 4              | 4              | 4         |
|                           | <b>Total</b>       |                    |                    |                    |                | <b>12</b>       | <b>12</b>      | <b>12</b>      | <b>12</b> | <b>12</b>      | <b>12 (-2)</b> | <b>12</b>      | <b>12 (-1)</b> | <b>12</b>      | <b>12</b>      | <b>12</b>      | <b>12</b> |
| 2021                      | 20                 |                    |                    |                    |                | 4               | 4              | 4              | 4         | 4              | 4              | 4              | 4              | 4              | 4              | 4              | 4         |
|                           | 23                 | 3 (3, 3)           | 3 (3, 3)           |                    |                |                 |                |                |           |                |                |                |                |                |                |                |           |
|                           | 24                 |                    |                    | 4 (4, 4)           | 4 (4, 3)       |                 |                |                |           | 4              | 4              | 4              | 4              |                |                |                |           |
|                           | 25                 | 4 (4, 4)           | 4 (4, 4)           |                    |                | 4               | 4              | 4              | 4         |                |                |                |                | 4              | 4              | 4              | 4         |
|                           | 26                 |                    |                    | 4 (4, 3)           | 4 (4, 2)       |                 |                |                |           |                |                |                |                |                |                |                |           |
|                           | 27                 | 4 (4, 4)           | 3 (3, 3)           |                    |                |                 |                |                |           |                |                |                |                |                |                |                |           |
|                           | 28                 |                    |                    | 4 (4, 4)           | 4 (4, 2)       | 4               | 4              | 4              | 4         | 4              | 4              | 4              | 4              | 4              | 4              | 4              | 4         |
|                           | 29                 | 4 (4, 2)           | 4 (4, 4)           |                    |                |                 |                |                |           |                |                |                |                |                |                |                |           |
|                           | 30                 |                    |                    | 4 (4, 4)           | 4 (4, 4)       |                 |                |                |           |                |                |                |                |                |                |                |           |
|                           | 31                 |                    | 4 (4, 3)           |                    |                |                 |                |                |           |                |                |                |                |                |                |                |           |
|                           | 32                 |                    |                    | 4 (4, 2)           | 4 (4, 4)       |                 |                |                |           |                |                |                |                |                |                |                |           |
|                           | 33                 | 4 (2, 2)           | 3 (1, 2)           |                    |                | 4               | 4              | 4              | 4         | 4              | 4              | 4              | 4              | 4              | 4              | 4              | 4         |
|                           | 34                 |                    |                    | 4 (4, 4)           | 3 (2, 2)       |                 |                |                |           |                |                |                |                |                |                |                |           |
|                           | 35                 | 2 (1, 1)           |                    |                    |                |                 |                |                |           |                |                |                |                |                |                |                |           |
|                           | 36                 |                    |                    | 4 (0, 0)           | 4 (0, 0)       |                 |                |                |           |                |                |                |                |                |                |                |           |
|                           | 37                 | 4 (0, 0)           | 4 (0, 0)           |                    |                |                 |                |                |           |                |                |                |                |                |                |                |           |
|                           | 38                 |                    |                    |                    |                | 4               | 4              | 4              | 4 (-1)    | 4              | 4              | 4              | 4              | 4              | 4              | 4 (-2)         | 4         |
|                           | 40                 | 4 (3, 2)           | 3 (3, 3)           |                    |                |                 |                |                |           |                |                |                |                |                |                |                |           |
|                           | 41                 |                    |                    | 4 (0, 0)           | 4 (0, 0)       |                 |                |                |           |                |                |                |                |                |                |                |           |
| 44                        | 4 (4, 4)           | 4 (0, 0)           | 4 (0, 0)           | 4 (0, 0)           |                |                 |                |                |           |                |                |                |                |                |                |                |           |
| 48                        | 4 (0, 0)           | 4 (0, 0)           |                    |                    |                |                 |                |                |           |                |                |                |                |                |                |                |           |
| <b>Total</b>              | <b>37 (27, 14)</b> | <b>36 (24, 17)</b> | <b>36 (24, 20)</b> | <b>35 (22, 17)</b> | <b>20</b>      | <b>20</b>       | <b>20</b>      | <b>20 (-1)</b> | <b>20</b> | <b>20</b>      | <b>20</b>      | <b>20</b>      | <b>20</b>      | <b>20</b>      | <b>20 (-2)</b> | <b>20</b>      |           |
| 2022                      | 19                 | 4 (0, 0)           | 4 (1, 1)           |                    |                |                 |                |                |           |                |                |                |                |                |                |                |           |
|                           | 20                 |                    |                    | 4 (4, 3)           | 4 (4, 1)       | 4               | 4              | 4              | 4         | 4              | 4 (-2)         | 4              | 4 (-1)         | 4              | 4              | 4              | 4 (-1)    |
|                           | 21                 | 4 (4, 4)           | 4 (4, 2)           |                    |                |                 |                |                |           |                |                |                |                |                |                |                |           |
|                           | 22                 |                    |                    | 4 (4, 4)           | 4 (4, 4)       |                 |                |                |           |                |                |                |                |                |                |                |           |
|                           | 23                 | 2 (1, 1)           | 4 (2, 2)           |                    |                |                 |                |                |           |                |                |                |                |                |                |                |           |
|                           | 24                 |                    |                    | 4 (4, 4)           | 4 (4, 4)       | 4               | 4              | 4              | 4         | 4              | 4              | 4              | 4              | 4              | 4              | 4              | 4         |
|                           | 25                 | 4 (4, 4)           | 4 (3, 3)           |                    |                |                 |                |                |           |                |                |                |                |                |                |                |           |
|                           | 26                 |                    |                    | 4 (4, 4)           | 4 (3, 3)       |                 |                |                |           |                |                |                |                |                |                |                |           |
|                           | 27                 | 4 (3, 3)           | 4 (4, 4)           |                    |                |                 |                |                |           |                |                |                |                |                |                |                |           |
|                           | 28                 |                    |                    | 4 (4, 4)           | 4 (4, 4)       | 4 (-1)          | 4 (-1)         | 4              | 4 (-2)    | 4              | 4              | 4              | 4 (-1)         | 4 (-1)         | 4 (-1)         | 4              | 4 (-1)    |
|                           | 29                 | 4 (0, 0)           | 4 (0, 0)           |                    |                |                 |                |                |           |                |                |                |                |                |                |                |           |
|                           | 30                 |                    |                    | 4 (4, 4)           | 4 (4, 4)       |                 |                |                |           |                |                |                |                |                |                |                |           |
|                           | 31                 | 4 (3, 3)           | 3 (1, 1)           |                    |                |                 |                |                |           |                |                |                |                |                |                |                |           |
|                           | 32                 |                    |                    | 4 (4, 3)           | 4 (4, 4)       |                 |                |                |           |                |                |                |                |                |                |                |           |
|                           | 33                 | 5 (4, 4)           | 4 (2, 2)           |                    |                | 4               | 4              | 4              | 4         | 4              | 4              | 4              | 4              | 4              | 4              | 4              | 4         |
|                           | 34                 |                    |                    | 4 (4, 4)           | 4 (1, 1)       |                 |                |                |           |                |                |                |                |                |                |                |           |
|                           | 35                 | 4 (0, 0)           | 4 (4, 1)           |                    |                |                 |                |                |           |                |                |                |                |                |                |                |           |
| 37                        | 4 (3, 3)           | 4 (0, 0)           |                    |                    |                |                 |                |                |           |                |                |                |                |                |                |                |           |
| 38                        |                    |                    |                    |                    | 4              | 4               | 4 (-1)         | 4 (-1)         |           |                |                |                | 4              | 4 (-3)         | 4              | 4              |           |
| 39                        |                    |                    | 4 (4, 0)           | 4 (4, 0)           |                |                 |                |                | 4         | 4              | 4              | 4              |                |                |                |                |           |
| 40                        | 4 (0, 0)           | 4 (0, 0)           |                    |                    |                |                 |                |                |           |                |                |                |                |                |                |                |           |
| 42                        |                    |                    | 4 (0, 0)           | 4 (0, 0)           |                |                 |                |                |           |                |                |                |                |                |                |                |           |
| 43                        | 4 (2, 1)           | 4 (1, 1)           |                    |                    |                |                 |                |                |           |                |                |                |                |                |                |                |           |
| 45                        | 4 (0, 0)           | 4 (0, 0)           | 4 (0, 0)           | 4 (0, 0)           |                |                 |                |                |           |                |                |                |                |                |                |                |           |
| <b>Total</b>              | <b>51 (24, 15)</b> | <b>51 (22, 16)</b> | <b>44 (36, 30)</b> | <b>44 (32, 25)</b> | <b>20 (-1)</b> | <b>20 (-1)</b>  | <b>20 (-1)</b> | <b>20 (-3)</b> | <b>20</b> | <b>20 (-2)</b> | <b>20</b>      | <b>20 (-2)</b> | <b>20 (-1)</b> | <b>20 (-4)</b> | <b>20</b>      | <b>20 (-2)</b> |           |
| <b>Total over 3 years</b> | <b>88 (51, 29)</b> | <b>87 (46, 33)</b> | <b>80 (60, 50)</b> | <b>79 (54, 42)</b> | <b>52 (-1)</b> | <b>52 (-1)</b>  | <b>52 (-1)</b> | <b>52 (-4)</b> | <b>52</b> | <b>52 (-4)</b> | <b>52</b>      | <b>52 (-3)</b> | <b>52 (-1)</b> | <b>52 (-4)</b> | <b>52 (-2)</b> | <b>52 (-2)</b> |           |

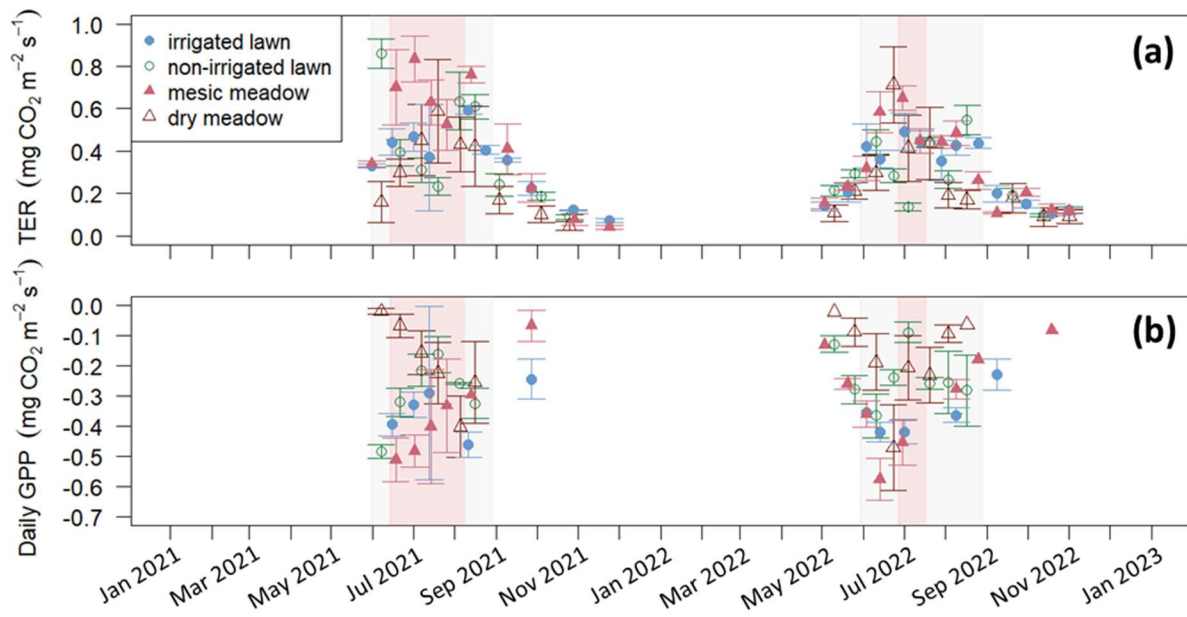

**Figure S1.** Dynamics of the measured TER (a) and calculated daily GPP (b), where the irrigated lawn is KMP lawn, the non-irrigated lawn is VKI lawn, the mesic meadow is KMP meadow, and the dry meadow is VKI meadow. Red rectangles indicate the drought periods according to the SPEI and light grey rectangles represent the summer season.

**Table S3.** Model parameters used in JSBACH.

| Parameters     | Sites          |                    |              |            |
|----------------|----------------|--------------------|--------------|------------|
|                | irrigated lawn | non-irrigated lawn | mesic meadow | dry meadow |
| root depth     | 0.12           | 0.12               | 0.20         | 0.18       |
| field capacity | 0.14           | 0.05               | 0.11         | 0.05       |
| wilting point  | 0.34           | 0.25               | 0.33         | 0.21       |
| max LAI        | 2.2            | 1.6                | 4.1          | 1.1        |
| fcrit          | 0.9            | 0.9                | 0.8          | 0.9        |
| fwilt          | 0.33           | 0.2                | 0.28         | 0.28       |

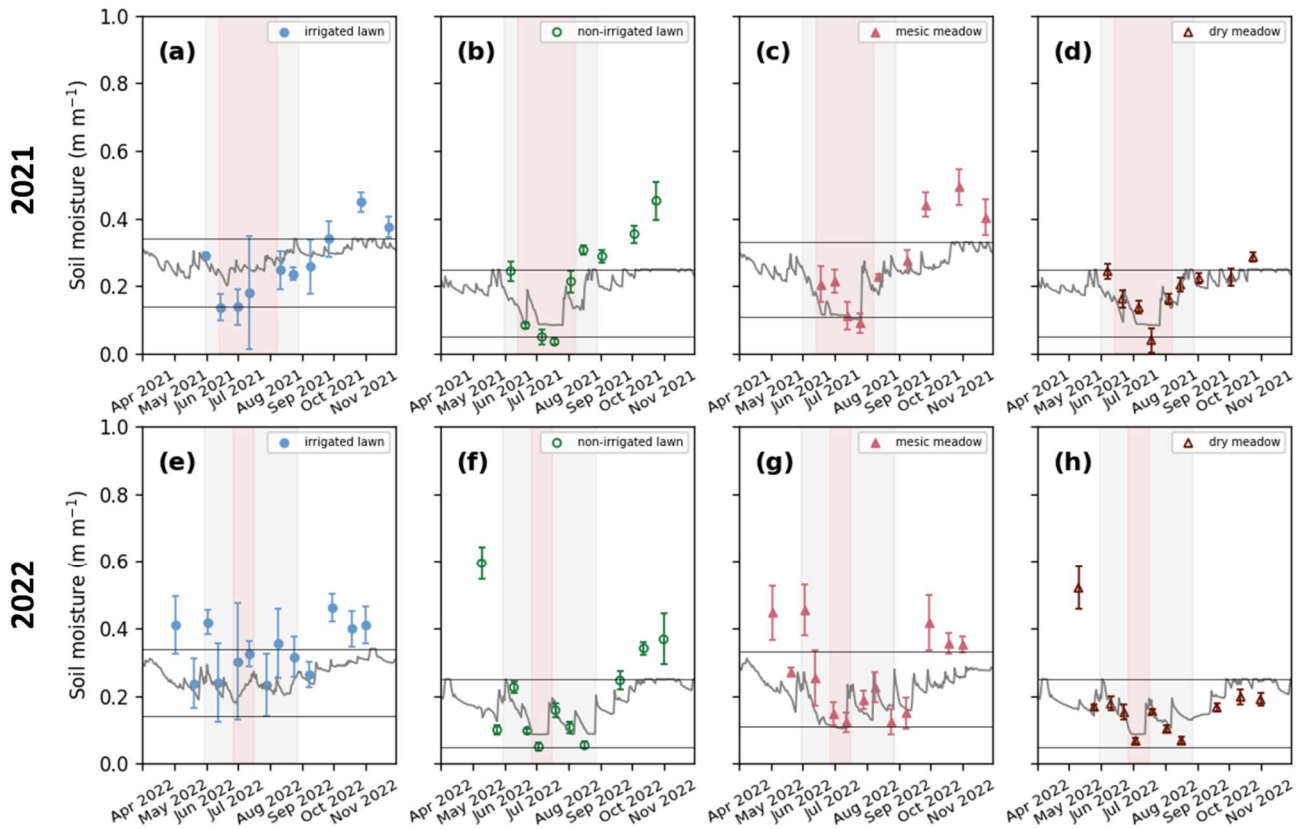

**Figure S2.** Annual dynamics of soil moisture at the four intensive sites. Grey continuous lines represent JSBACH simulations and triangles and dots represent the mean of manual measurements with standard deviation bars. (a, e) Irrigated lawn = KMP lawn; (b, f) non-irrigated lawn = VKI lawn; (c, g) mesic meadow = KMP meadow; (d, h) dry meadow = VKI meadow. Red rectangles indicate the drought periods according to the SPEI and light grey rectangles represent the summer season.

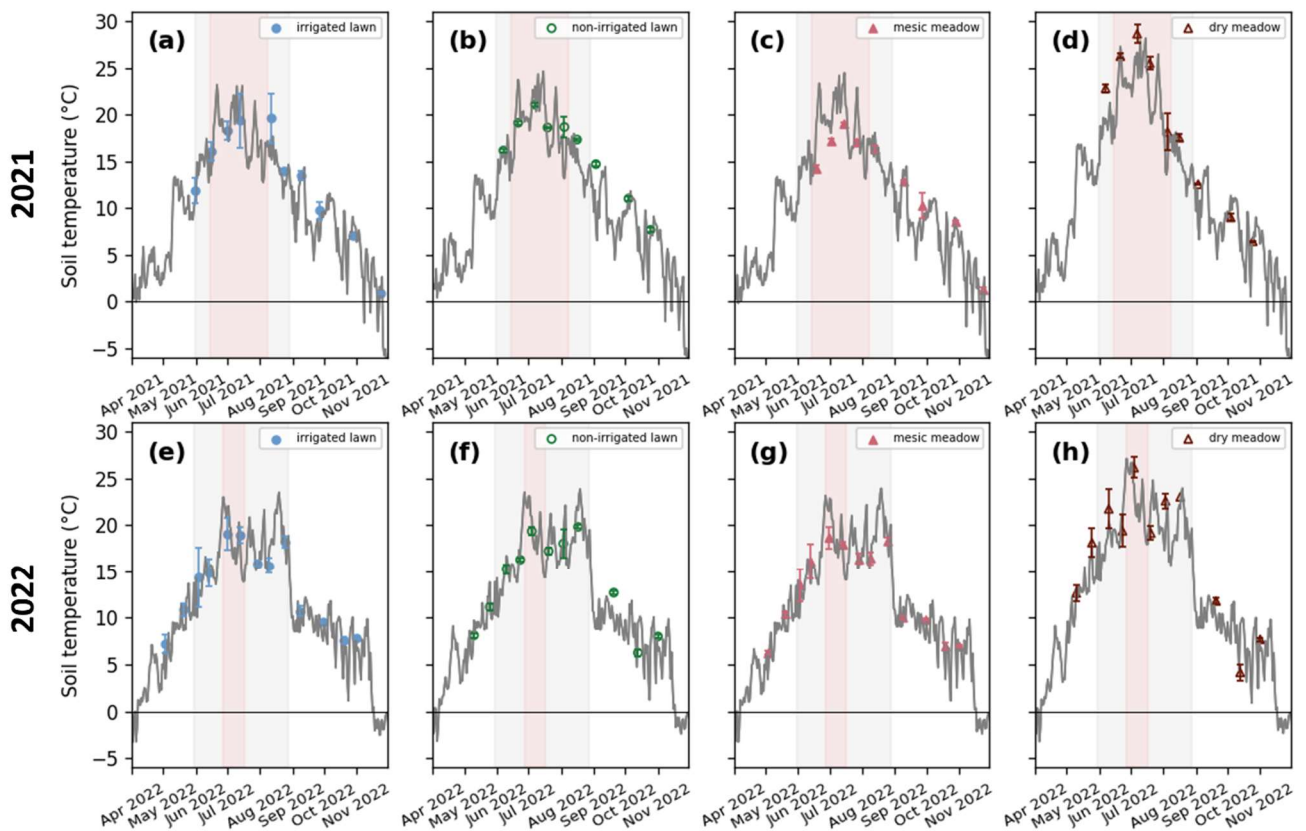

**Figure S3.** Annual dynamics of soil temperature at the four intensive sites. Grey continuous lines represent JSBACH simulations and triangles and dots represent the mean of manual measurements with standard deviation bars. (a, e) Irrigated lawn = KMP lawn; (b, f)

non-irrigated lawn = VKI lawn; (c, g) mesic meadow = KMP meadow; (d, h) dry meadow = VKI meadow. Red rectangles indicate the drought periods according to the SPEI and light grey rectangles represent the summer season.

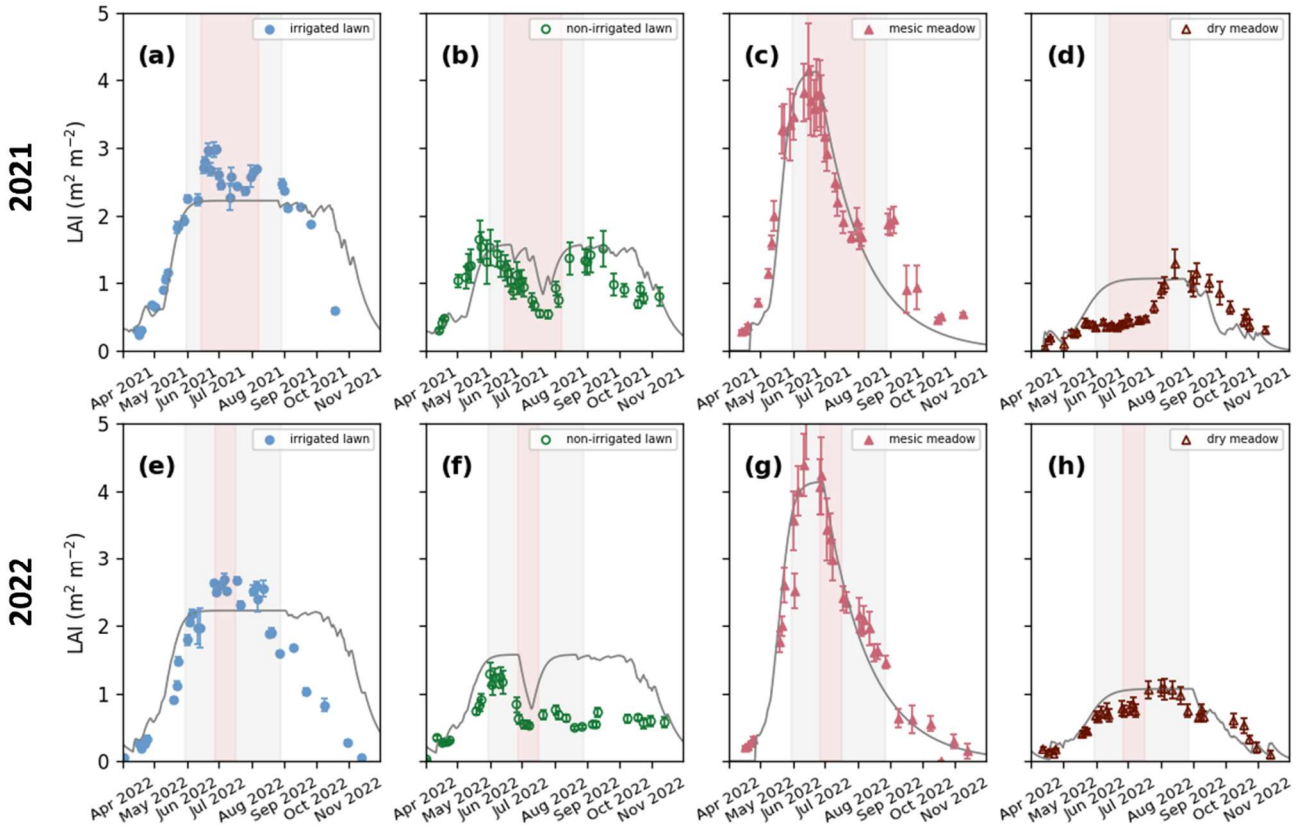

**Figure S4.** Annual dynamics of leaf area index (LAI) at the four intensive sites. Grey continuous lines represent JSBACH simulations and triangles and dots represent the mean of manual measurements with standard deviation bars. (a, e) Irrigated lawn = KMP lawn; (b, f) non-irrigated lawn = VKI lawn; (c, g) mesic meadow = KMP meadow; (d, h) dry meadow = VKI meadow. Red rectangles indicate the drought periods according to the SPEI and light grey rectangles represent the summer season.

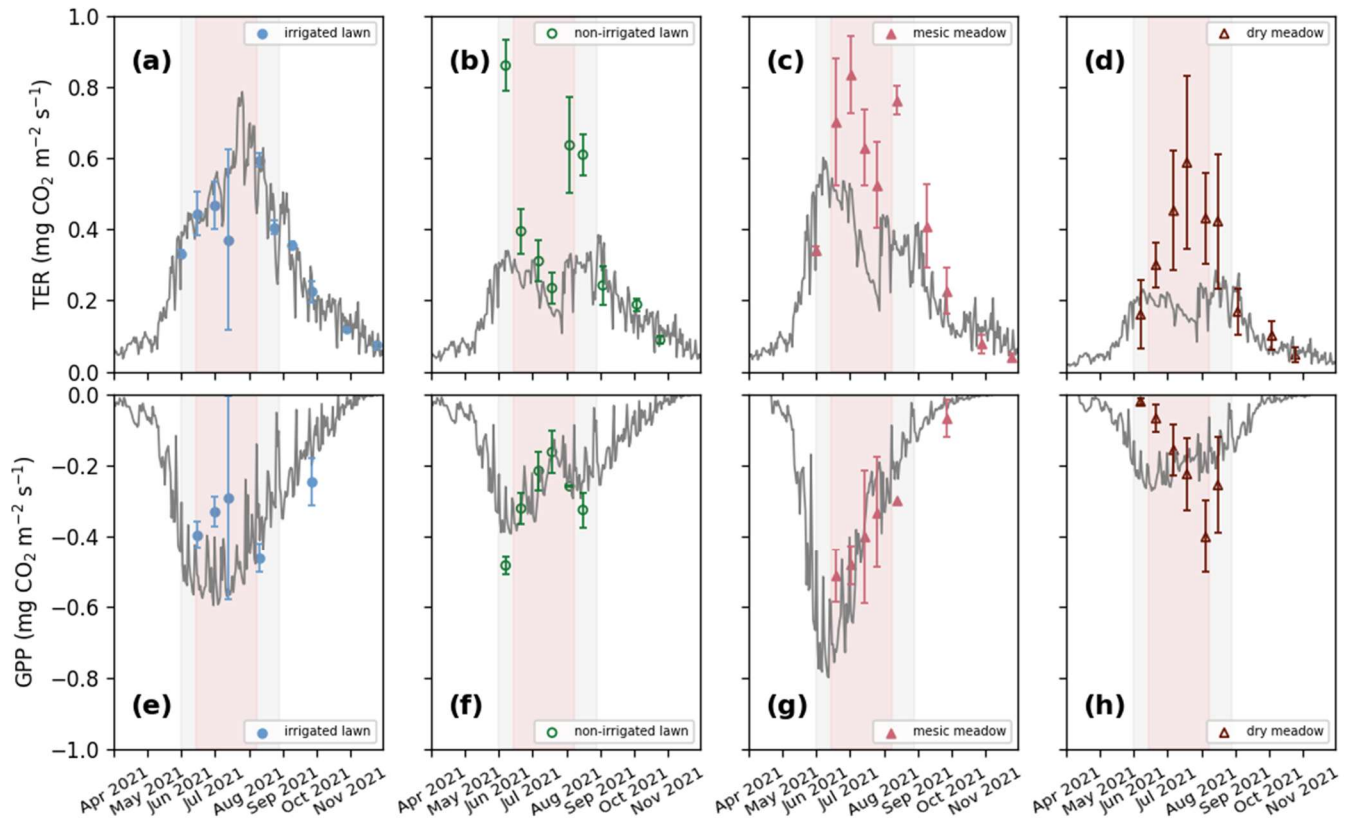

**Figure S5.** Seasonal dynamics of mean total ecosystem respiration (TER, abcd) and daily photosynthesis (GPP, efgh) in the four intensive sites in 2021. Grey continuous lines represent JSBACH simulations and triangles and dots represent the mean of manual measurements with standard deviation bars. (a, e) Irrigated lawn = KMP lawn; (b, f) non-irrigated lawn = VKI lawn; (c, g) mesic meadow = KMP meadow; (d, h) dry meadow = VKI meadow. Red rectangles indicate the drought periods according to the SPEI and light grey rectangles represent the summer season.

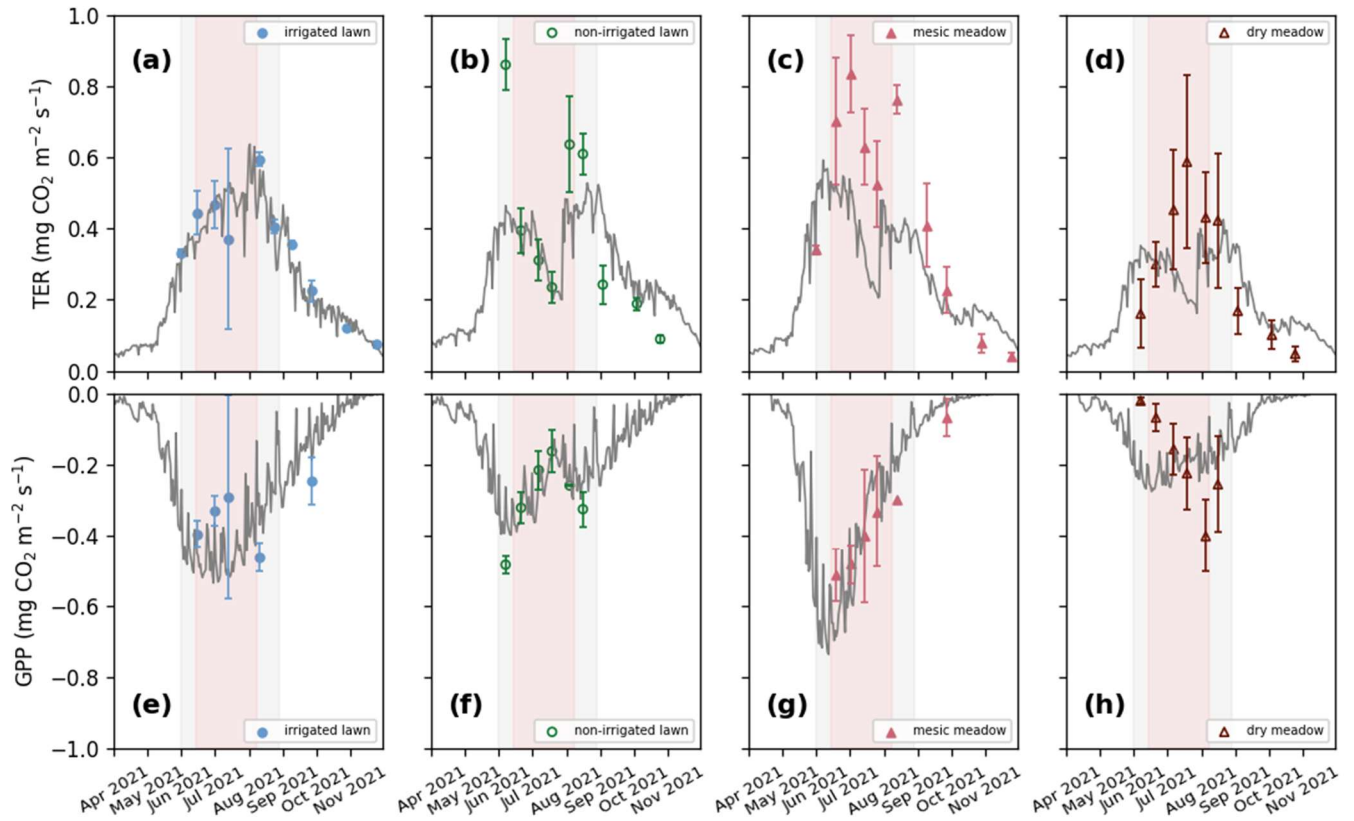

**Figure S6.** Seasonal dynamics of mean total ecosystem respiration (TER, abcd) and daily photosynthesis (GPP, efgh) in the four intensive sites in 2021 when the soil carbon pools were adjusted to meet the observed TER values. Grey continuous lines represent JSBACH simulations and triangles and dots represent the mean of manual measurements with standard deviation bars. (a, e) Irrigated lawn = KMP lawn; (b, f) non-irrigated lawn = VKI lawn; (c, g) mesic meadow = KMP meadow; (d, h) dry meadow = VKI meadow. Red rectangles indicate the drought periods according to the SPEI and light grey rectangles represent the summer season.

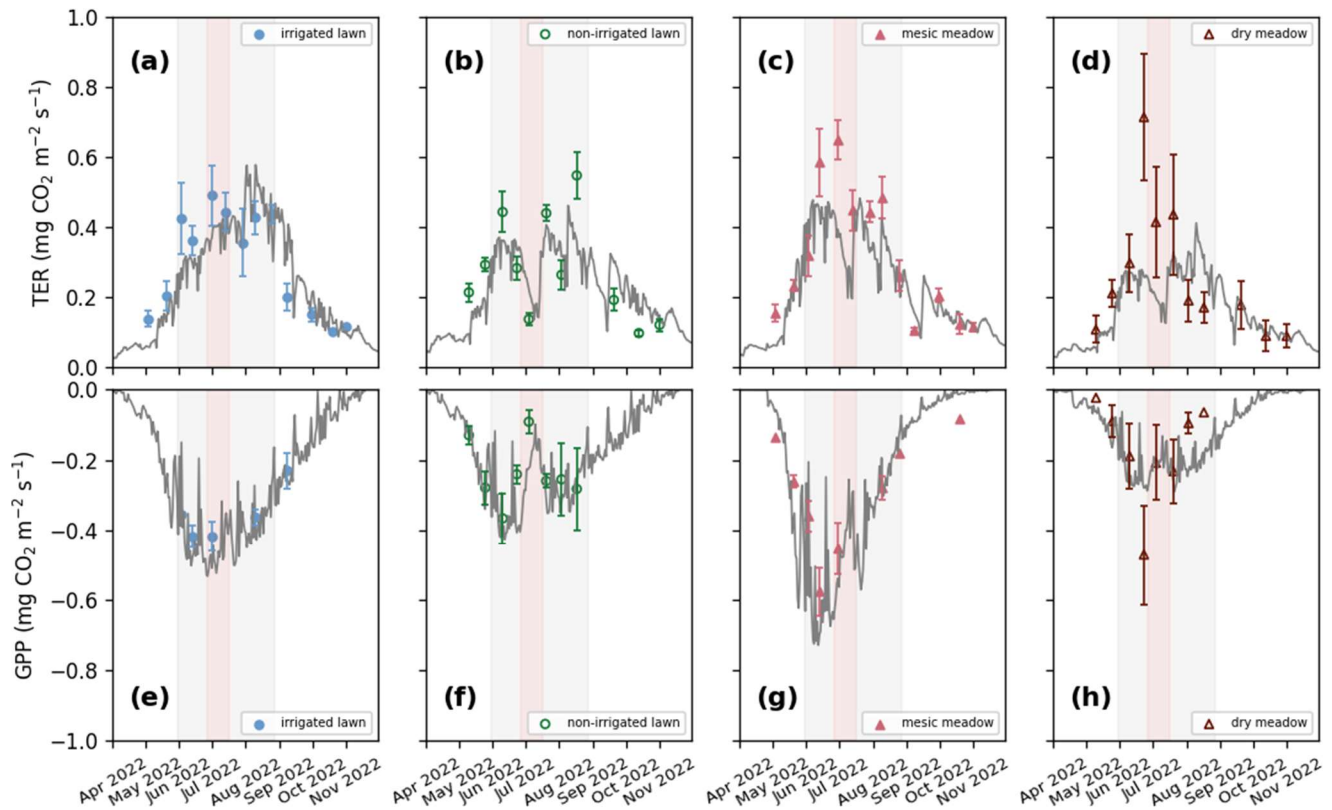

**Figure S7.** Seasonal dynamics of mean total ecosystem respiration (TER, abcd) and daily photosynthesis (GPP, efg) in the four intensive sites in 2022 when the soil carbon pools were adjusted to meet the observed TER values. Grey continuous lines represent JSBACH simulations and triangles and dots represent the mean of manual measurements with standard deviation bars. (a, e) Irrigated lawn = KMP lawn; (b, f) non-irrigated lawn = VKI lawn; (c, g) mesic meadow = KMP meadow; (d, h) dry meadow = VKI meadow. Red rectangles indicate the drought periods according to the SPEI and light grey rectangles represent the summer season.

**Table S4.** Annual net ecosystem exchange (NEE) calculated with JSBACH for the year 2021 and 2022 with adjusted soil carbon content.

| Year | Sites      | Characteristics    | Annual NEE<br>(g CO <sub>2</sub> m <sup>-2</sup> yr <sup>-1</sup> ) | NEE for Apr-Oct<br>(g CO <sub>2</sub> m <sup>-2</sup> yr <sup>-1</sup> ) |
|------|------------|--------------------|---------------------------------------------------------------------|--------------------------------------------------------------------------|
| 2021 | KMP lawn   | Irrigated lawn     | 328                                                                 | -209                                                                     |
|      | VKI lawn   | Non-irrigated lawn | 2663                                                                | 1722                                                                     |
|      | KMP meadow | Mesic meadow       | 1476                                                                | 703                                                                      |
|      | VKI meadow | Dry meadow         | 2140                                                                | 1499                                                                     |
| 2022 | KMP lawn   | Irrigated lawn     | -195                                                                | -801                                                                     |
|      | VKI lawn   | Non-irrigated lawn | 1496                                                                | 519                                                                      |
|      | KMP meadow | Mesic meadow       | 571                                                                 | -283                                                                     |
|      | VKI meadow | Dry meadow         | 1205                                                                | 566                                                                      |

**Table S5.** R<sup>2</sup> calculated for soil moisture, soil temperature and LAI in the standard simulation where the soil carbon was stabilized based on the standing vegetation in 2021 and 2022.

| Year | Sites      | Characteristics    | R <sup>2</sup> for soil moisture | R <sup>2</sup> for soil temperature | R <sup>2</sup> for LAI |
|------|------------|--------------------|----------------------------------|-------------------------------------|------------------------|
| 2021 | KMP lawn   | Irrigated lawn     | 0.868                            | 0.910                               | 0.857                  |
|      | VKI lawn   | Non-irrigated lawn | 0.866                            | 0.654                               | 0.260                  |
|      | KMP meadow | Mesic meadow       | 0.885                            | 0.927                               | 0.920                  |
|      | VKI meadow | Dry meadow         | 0.776                            | 0.896                               | 0.161                  |
| 2022 | KMP lawn   | Irrigated lawn     | 0.549                            | 0.961                               | 0.709                  |
|      | VKI lawn   | Non-irrigated lawn | 0.425                            | 0.885                               | 0.509                  |
|      | KMP meadow | Mesic meadow       | 0.653                            | 0.957                               | 0.920                  |
|      | VKI meadow | Dry meadow         | 0.068                            | 0.880                               | 0.826                  |



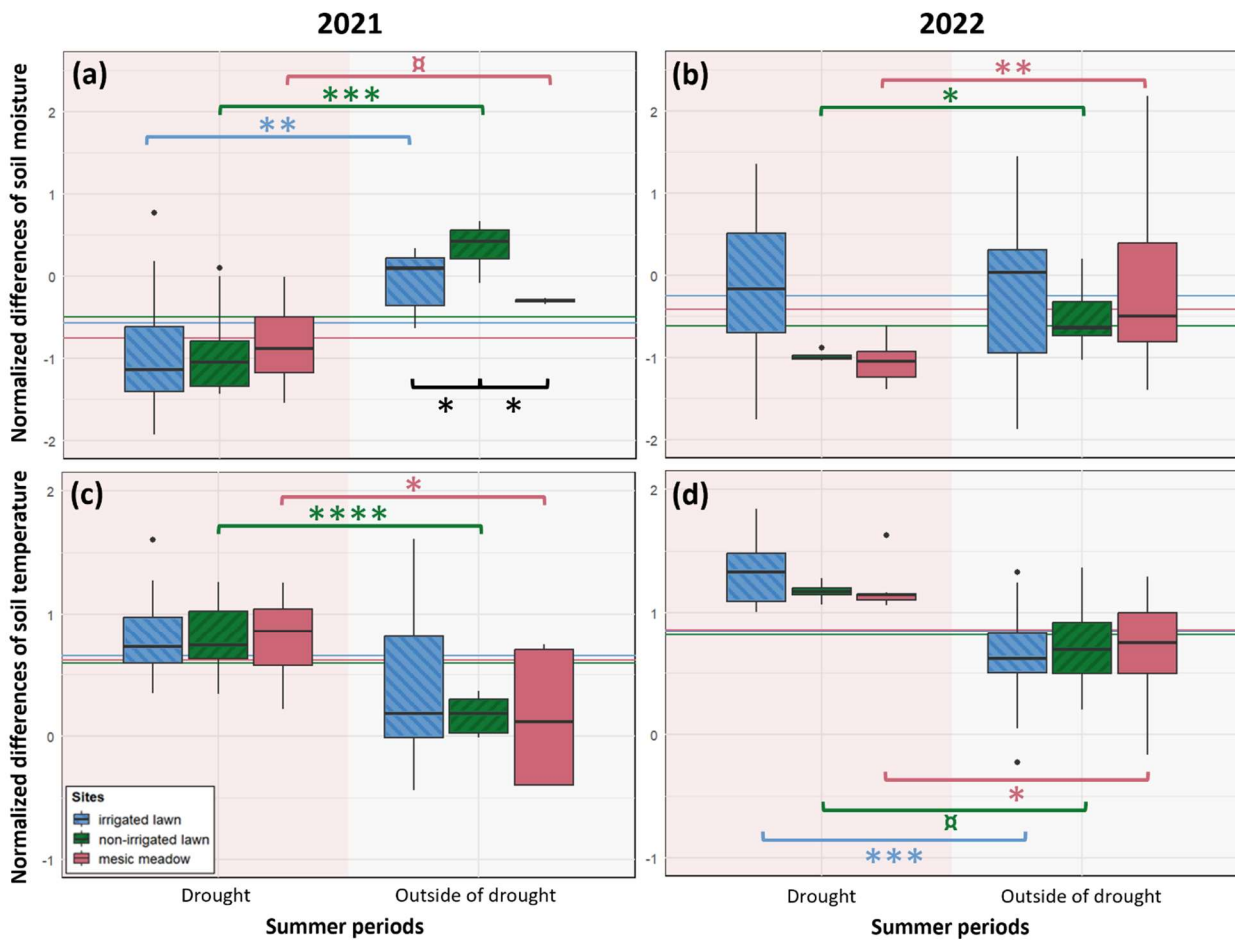

**Figure S8.** The resistance indices of lawns and meadows to drought events in 2021 and 2022, where the irrigated lawn is KMP lawn, the non-irrigated lawn is VKI lawn, the mesic meadow is KMP meadow, and the dry meadow is VKI meadow. The values are normalized differences between the measured values during the drought and outside it between June to August in 2021 (first column) and in 2022 (second column), calculated for the soil moisture at 5 cm depth ((a) and (b)) and the soil temperature at 10 cm depth ((c) and (d)). Horizontal lines represent the summer average of each site. Droughts were defined in Fig. 2 (June 14<sup>th</sup>–August 8<sup>th</sup>, 2021 and June 27<sup>th</sup>–July 17<sup>th</sup>, 2022). (□ for p-value ≤ 0.10; \* for p-value ≤ 0.05; \*\* for p-value ≤ 0.01; \*\*\* for p-value ≤ 0.001; and \*\*\*\* for a p-value ≤ 0.0001).

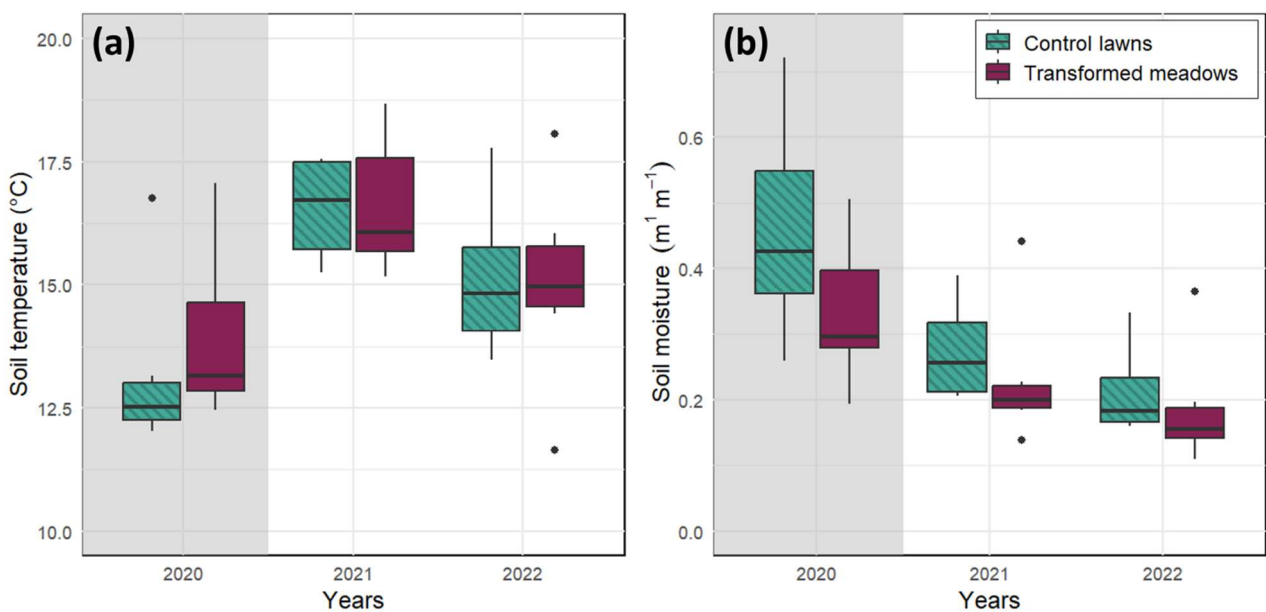

**Figure S9.** (a) soil temperature at 10 cm depth, and (b) soil moisture at 5 cm depth measured on the satellite sites before and after transformation, which happened at the end of 2020 only on the transformed lawns (□ for p-value ≤ 0.10; and \* for p-value ≤ 0.05).

**Table S6.** Correlation values between cover proportions of the plant functional types. The plant functional types are legumes (*Fabaceae*), grasses (*Poaceae*), forbs (other families of flowering vascular plants, which do not belong to one of the listed categories), trees, sedges (*Carex*), horsetails (*Equisetum*), and mosses (*Bryophyta*).

|                   | <b>Grasses</b> | <b>Legumes</b> | <b>Forbs</b> | <b>Trees</b> | <b>Sedges</b> | <b>Horsetails</b> | <b>Mosses</b> |
|-------------------|----------------|----------------|--------------|--------------|---------------|-------------------|---------------|
| <b>Grasses</b>    | 1.00           |                |              |              |               |                   |               |
| <b>Legumes</b>    | -0.42          | 1.00           |              |              |               |                   |               |
| <b>Forbs</b>      | -0.55          | 0.21           | 1.00         |              |               |                   |               |
| <b>Trees</b>      | -0.24          | -0.28          | 0.11         | 1.00         |               |                   |               |
| <b>Sedges</b>     | -0.14          | 0.08           | 0.36         | -0.15        | 1.00          |                   |               |
| <b>Horsetails</b> | 0.08           | 0.01           | 0.11         | -0.21        | 0.73          | 1.00              |               |
| <b>Mosses</b>     | 0.03           | -0.31          | -0.31        | 0.33         | -0.07         | -0.10             | 1.00          |
